# Supplementary material for: Impact of SLC20A1 on the Wnt/β-catenin signaling pathway in somatotroph adenomas
Source: PubMed Central journal article supplement — Mol Med Rep. 2019 Aug 6;20(4):3276–84. doi: 10.3892/mmr.2019.10555 (PMC6755178; doi:10.3892/mmr.2019.10555), 2019-08-06
Supplement: Supplementary_Data.pdf [file Supplementary_Data.pdf]

Table SI. Data for the 52 patients with somatotroph adenomas.

| No. | Sex | Age, years | Invasion | Knosp/Left | Knosp/Right | Headache | Acromegaly | Snoring | Tumor volume, cm <sup>3</sup> | Recurrence |
|-----|-----|------------|----------|------------|-------------|----------|------------|---------|-------------------------------|------------|
| 1   | M   | 21         | Y        | IV         | I           | Y        | Y          | N       | 17.60                         | N          |
| 2   | M   | 16         | Y        | IV         | IV          | N        | Y          | N       | 15.10                         | Y          |
| 3   | M   | 38         | Y        | IV         | IV          | Y        | Y          | N       | 16.90                         | Y          |
| 4   | M   | 56         | Y        | IV         | IV          | Y        | N          | N       | 11.70                         | N          |
| 5   | M   | 54         | Y        | IV         | IV          | N        | Y          | N       | 16.60                         | N          |
| 6   | M   | 25         | Y        | IV         | IV          | Y        | N          | N       | 18.70                         | Y          |
| 7   | M   | 17         | Y        | IV         | IV          | Y        | Y          | N       | 17.80                         | Y          |
| 8   | M   | 34         | Y        | IV         | II          | Y        | Y          | N       | 8.65                          | N          |
| 9   | F   | 27         | Y        | IV         | IV          | N        | Y          | N       | 16.20                         | Y          |
| 10  | M   | 28         | Y        | 0          | IV          | N        | Y          | N       | 10.20                         | N          |
| 11  | F   | 41         | Y        | IV         | 0           | Y        | N          | N       | 9.70                          | N          |
| 12  | F   | 31         | Y        | IV         | IV          | N        | Y          | N       | 17.40                         | N          |
| 13  | M   | 49         | Y        | I          | IV          | Y        | Y          | N       | 8.60                          | N          |
| 14  | M   | 50         | Y        | IV         | 0           | Y        | Y          | N       | 9.80                          | N          |
| 15  | F   | 45         | Y        | IV         | IV          | Y        | Y          | Y       | 15.20                         | Y          |
| 16  | M   | 25         | N        | I          | I           | Y        | N          | N       | 4.80                          | N          |
| 17  | F   | 40         | N        | I          | 0           | Y        | Y          | N       | 2.24                          | N          |
| 18  | F   | 35         | N        | I          | II          | N        | Y          | Y       | 3.00                          | Y          |
| 19  | F   | 41         | N        | 0          | 0           | N        | Y          | N       | 3.42                          | N          |
| 20  | F   | 46         | N        | 0          | 0           | N        | Y          | N       | 2.60                          | N          |
| 21  | M   | 35         | N        | 0          | I           | N        | Y          | Y       | 2.48                          | N          |
| 22  | M   | 38         | N        | 0          | 0           | N        | Y          | N       | 2.55                          | N          |
| 23  | F   | 48         | N        | 0          | 0           | Y        | Y          | Y       | 3.40                          | N          |
| 24  | M   | 40         | N        | 0          | 0           | N        | Y          | Y       | 3.60                          | N          |
| 25  | M   | 44         | N        | 0          | 0           | Y        | Y          | Y       | 2.30                          | N          |
| 26  | F   | 45         | N        | 0          | 0           | N        | Y          | N       | 2.40                          | N          |
| 27  | M   | 45         | N        | 0          | 0           | N        | Y          | N       | 2.31                          | N          |
| 28  | M   | 46         | N        | 0          | I           | N        | Y          | Y       | 2.42                          | N          |
| 29  | M   | 47         | N        | 0          | 0           | N        | Y          | N       | 2.60                          | N          |
| 30  | F   | 45         | N        | 0          | 0           | N        | Y          | N       | 2.72                          | N          |
| 31  | F   | 59         | N        | II         | 0           | N        | Y          | N       | 4.90                          | Y          |
| 32  | F   | 55         | N        | 0          | 0           | N        | Y          | N       | 2.46                          | N          |
| 33  | M   | 52         | N        | 0          | 0           | N        | Y          | N       | 2.76                          | N          |
| 34  | M   | 41         | N        | 0          | 0           | Y        | Y          | N       | 3.72                          | N          |
| 35  | F   | 26         | N        | 0          | 0           | Y        | Y          | N       | 2.80                          | N          |
| 36  | F   | 38         | N        | I          | 0           | N        | N          | N       | 2.90                          | N          |
| 37  | M   | 55         | N        | 0          | 0           | N        | Y          | Y       | 4.22                          | Y          |
| 38  | F   | 62         | N        | 0          | 0           | Y        | Y          | N       | 5.21                          | Y          |
| 39  | F   | 41         | N        | 0          | 0           | Y        | Y          | N       | 3.81                          | N          |
| 40  | F   | 27         | N        | 0          | 0           | N        | Y          | N       | 2.44                          | N          |
| 41  | M   | 51         | N        | 0          | 0           | Y        | Y          | Y       | 3.50                          | N          |
| 42  | F   | 34         | N        | 0          | 0           | N        | Y          | N       | 3.90                          | N          |
| 43  | M   | 39         | N        | 0          | 0           | N        | Y          | Y       | 2.50                          | N          |
| 44  | M   | 50         | N        | I          | 0           | Y        | N          | N       | 3.10                          | N          |
| 45  | M   | 35         | N        | 0          | 0           | N        | Y          | Y       | 2.60                          | N          |
| 46  | F   | 27         | N        | I          | 0           | N        | Y          | N       | 2.40                          | N          |
| 47  | F   | 38         | N        | 0          | I           | Y        | Y          | Y       | 2.98                          | N          |
| 48  | F   | 56         | N        | 0          | 0           | N        | Y          | N       | 2.30                          | N          |
| 49  | F   | 33         | N        | I          | 0           | Y        | Y          | N       | 3.10                          | N          |
| 50  | M   | 38         | N        | 0          | 0           | N        | Y          | N       | 5.10                          | Y          |
| 51  | F   | 49         | N        | 0          | 0           | N        | Y          | Y       | 2.40                          | N          |
| 52  | M   | 36         | N        | I          | I           | N        | Y          | N       | 3.10                          | N          |

M, male; F, female; Y, yes; N, no.
